# Supplementary material
Source: Elsevier journal article supplement (https://www.sciencedirect.com/science/article/pii/S0014256521000680)
Supplement: mmc1 [file S0014256521000680:mmc1.pdf]

**Anexo.** Encuesta cumplimentada por los participantes del estudio.

## CUMPLIMIENTO DE LA DIETA MEDITERRÁNEA EN EL PERSONAL SANITARIO

Pedimos tu colaboración con motivo de la realización de un estudio transversal para valorar el cumplimiento de la dieta mediterránea en el personal sanitario en el contexto de un Trabajo de Fin de Grado.

Se trata de solicitar tu sincera respuesta a los ítems que te presentamos a continuación. La información aportada será de carácter totalmente anónimo, utilizada con meros fines de investigación.

### Categoría profesional:

- ☐ Enfermero/a      ☐ Técnico en cuidados auxiliares de enfermería      ☐ Celador
- ☐ Médico { ☐ Residente  
☐ Centro de Salud  
☐ Especialidad médica (no urgencias)  
☐ Especialidad médica (urgencias)  
☐ Especialidad médico-quirúrgica  
☐ Especialidad quirúrgica
- ☐ Estudiante de Medicina { ☐ 1<sup>er</sup> curso  
☐ 2<sup>o</sup> curso  
☐ 3<sup>er</sup> curso  
☐ 4<sup>o</sup> curso  
☐ 5<sup>o</sup> curso  
☐ 6<sup>o</sup> curso  
☐ MIR

**Turno:** ☐ Turno fijo    ☐ Rotatorio

Su jornada laboral incluye las **noches**: ☐ sí    ☐ no

Realiza **guardias**: ☐ sí    ☐ no      En caso de que sí: ☐ ≤ 4/mes    ☐ > 4/mes

**Edad:** \_\_\_\_    **Sexo:** ☐ Hombre ☐ Mujer    **Talla:** \_\_\_\_    **Peso:** \_\_\_\_

**HTA:** ☐ sí    ☐ no

En caso afirmativo, **recibe tratamiento:** ☐ sí    ☐ no

**Diabetes Mellitus:** ☐ sí    ☐ no

En caso afirmativo, **recibe tratamiento:** ☐ sí    ☐ no

**Dislipemia:** ☐ sí    ☐ no

En caso afirmativo, **recibe tratamiento:** ☐ sí    ☐ no

**Cardiopatía isquémica:** ☐ sí    ☐ no

**Enfermedad arterial periférica:** ☐ sí    ☐ no    **Accidente cerebrovascular:** ☐ sí    ☐ no

**EPOC:** ☐ sí    ☐ no

**Enfermedad renal crónica:** ☐ sí    ☐ no

### Alcohol:

¿Con qué frecuencia consume alguna bebida alcohólica?

☐ No consume      ☐ ≤ 1 vez al mes      ☐ 2-4 veces al mes

☐ 2-3 veces a la semana      ☐ ≥ 4 veces a la semana

¿Cuántas consumiciones suele realizar en un día de consumo normal?

☐ 1 o 2      ☐ 3 o 4      ☐ 5 o 6      ☐ 7 o 9      ☐ ≥ 10

¿Con qué frecuencia toma 6 o más bebidas alcohólicas en un solo día?

☐ Nunca      ☐ < 1 vez al mes      ☐ Mensualmente      ☐ Semanalmente

☐ A diario o casi a diario

### Tabaco:

☐ No fumador      ☐ Fumador      ☐ Exfumador (>1 año)

### Actividad física:

¿Con qué frecuencia realiza actividad física en su tiempo libre?:

☐ No realiza actividad física      ☐ 1-2 sesiones semanales      ☐  $\geq 3$  sesiones semanales

¿Qué volumen de tiempo dedica a realizar dicha actividad?:

☐  $< 30$  min por sesión      ☐ 30 min-1 h por sesión      ☐  $> 1$  h por sesión

El ejercicio realizado le supone un esfuerzo:

☐ Suave      ☐ Moderado      ☐ Intenso      ☐ Máximo, extenuante

Es usted el/la que **cocina habitualmente** en su domicilio: ☐ sí ☐ no

A continuación, nos interesa conocer sus hábitos de alimentación, por ello necesitamos que responda a algunas cuestiones relacionadas con su dieta. Marque con una X:

| Pregunta: (sí =1 punto; no = 0 puntos)                                                                                                                                                                              | Sí | No |
|---------------------------------------------------------------------------------------------------------------------------------------------------------------------------------------------------------------------|----|----|
| 1. ¿Usa usted el aceite de oliva para cocinar?                                                                                                                                                                      |    |    |
| 2. ¿Consume $\geq 2$ cucharadas de aceite de oliva en total al día (incluyendo el usado para freír, el de las comidas fuera de casa, las ensaladas, etc.)?                                                          |    |    |
| 3. ¿Consume $\geq 2$ raciones de verdura u hortalizas al día al menos 1 en ensaladas o crudas (guarniciones acompañamientos contabilizan como $\frac{1}{2}$ ración)?                                                |    |    |
| 4. ¿Consume $\geq 3$ piezas de fruta (incluyendo zumo natural) al día?                                                                                                                                              |    |    |
| 5. ¿Consume $< 1$ ración de carnes rojas, hamburguesas, salchichas, embutidos al día (una ración equivale a 100-150 g)?                                                                                             |    |    |
| 6. ¿Consume $< 1$ ración de mantequilla, margarina o nata al día (una porción individual equivale a 12 g)?                                                                                                          |    |    |
| 7. ¿Consume $< 1$ bebida carbonatada y/o azucarada (refrescos, colas, tónicas, bitter) al día?                                                                                                                      |    |    |
| 8. ¿Bebe vino? ¿Toma $\geq 3$ vasos a la semana?                                                                                                                                                                    |    |    |
| 9. ¿Consume $\geq 3$ raciones de legumbres a la semana (una ración o plato equivale a 150 g)?                                                                                                                       |    |    |
| 10. ¿Consume $\geq 3$ raciones de pescado o mariscos a la semana (un plato, pieza o ración equivale a 100-150 g de pescado o 4-5 piezas de marisco)?                                                                |    |    |
| 11. ¿Consume $\leq 3$ veces repostería comercial (no casera) como galletas, flanes, dulces o pasteles a la semana?                                                                                                  |    |    |
| 12. ¿Consume $\geq 1$ vez frutos secos a la semana (una ración equivale a 30 g)?                                                                                                                                    |    |    |
| 13. ¿Consume preferentemente carne de pollo, pavo o conejo en vez de ternera, cerdo, hamburguesas o salchichas (carne de pollo: una pieza o ración equivale a 100-150 g)?                                           |    |    |
| 14. ¿Consume $\geq 2$ veces a la semana los vegetales cocinados, la pasta, el arroz u otros platos aderezados con una salsa de tomate, ajo, cebolla o puerro elaborada a fuego lento con aceite de oliva (sofrito)? |    |    |

Puntuación total:

$< 9$  = bajo cumplimiento

$\geq 9$  = buen cumplimiento
